# Supplementary material for: Rank Difference Analysis of Microarrays (RDAM), a novel approach to statistical analysis of microarray expression profiling data
Source: Springer Nature journal article supplement (doi:10.1186/1471-2105-5-148), 2004-10-11

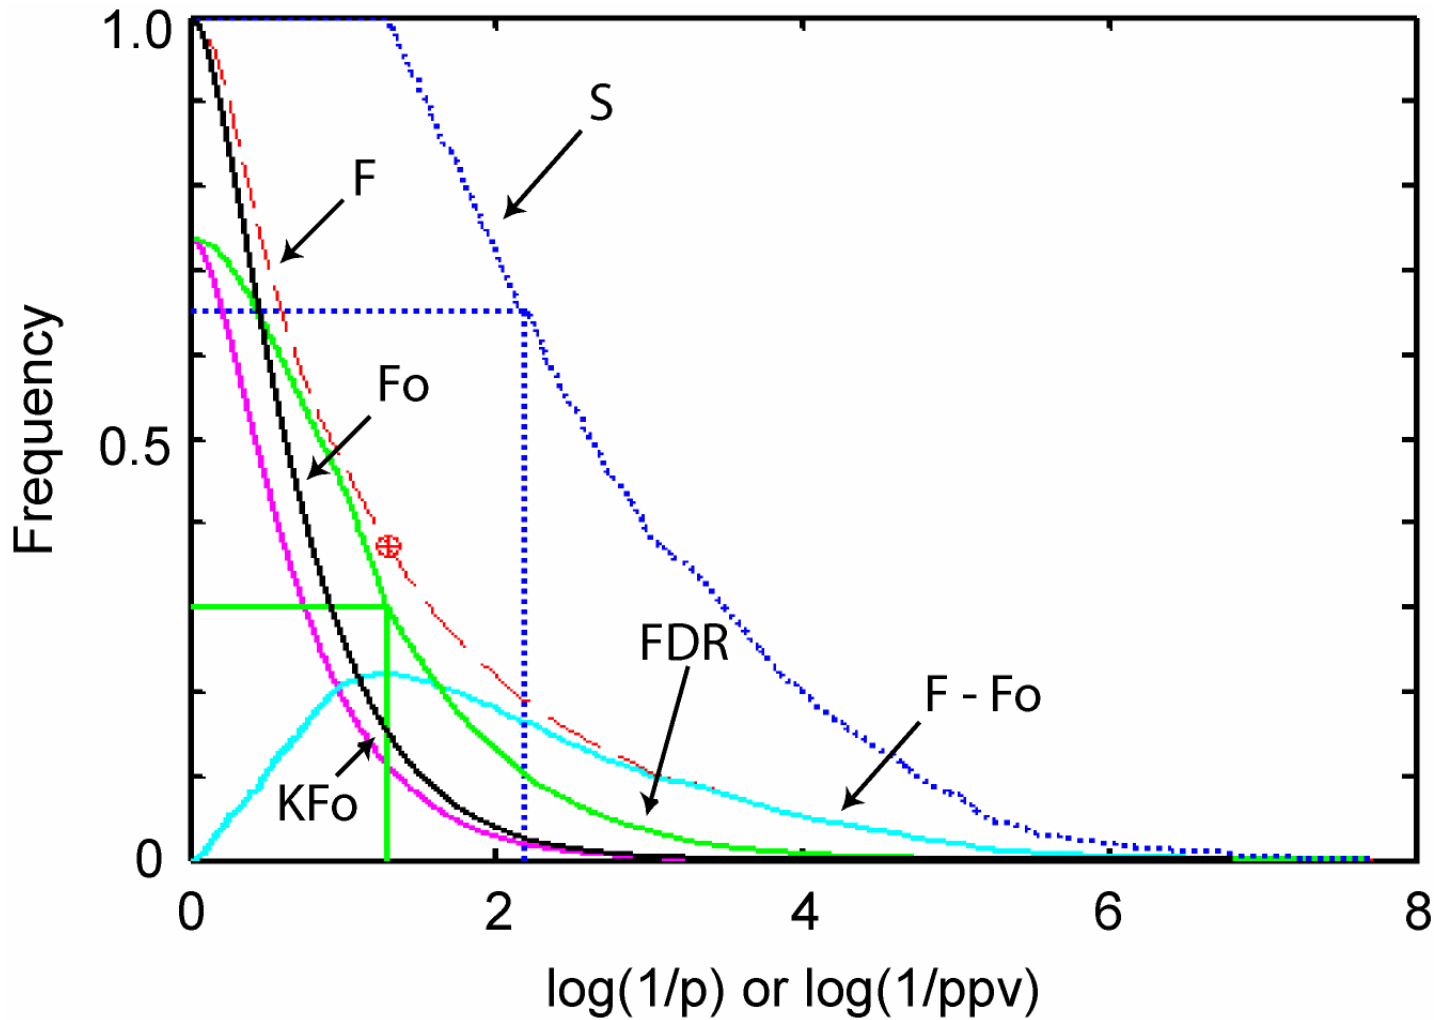

Supplement: 12859_2004_264_MOESM7_ESM.pdf [file 12859_2004_264_MOESM7_ESM.pdf]
